# Supplementary material
Source: MDPI journal article supplement (https://www.mdpi.com/2075-163X/10/1/27)
Supplement: s1 [file s1]

Archive with 3 entries (3 files):
- Figure S1 SIMS analytical points.docx.pdf
- Figure S2 Cathodoluminescence spectra.pdf
- Table S1 Results of SIMS measurements.pdf
