# Supplementary material
Source: MDPI journal article supplement (https://www.mdpi.com/2075-163X/10/1/27)
Supplement: s1 [file s1]

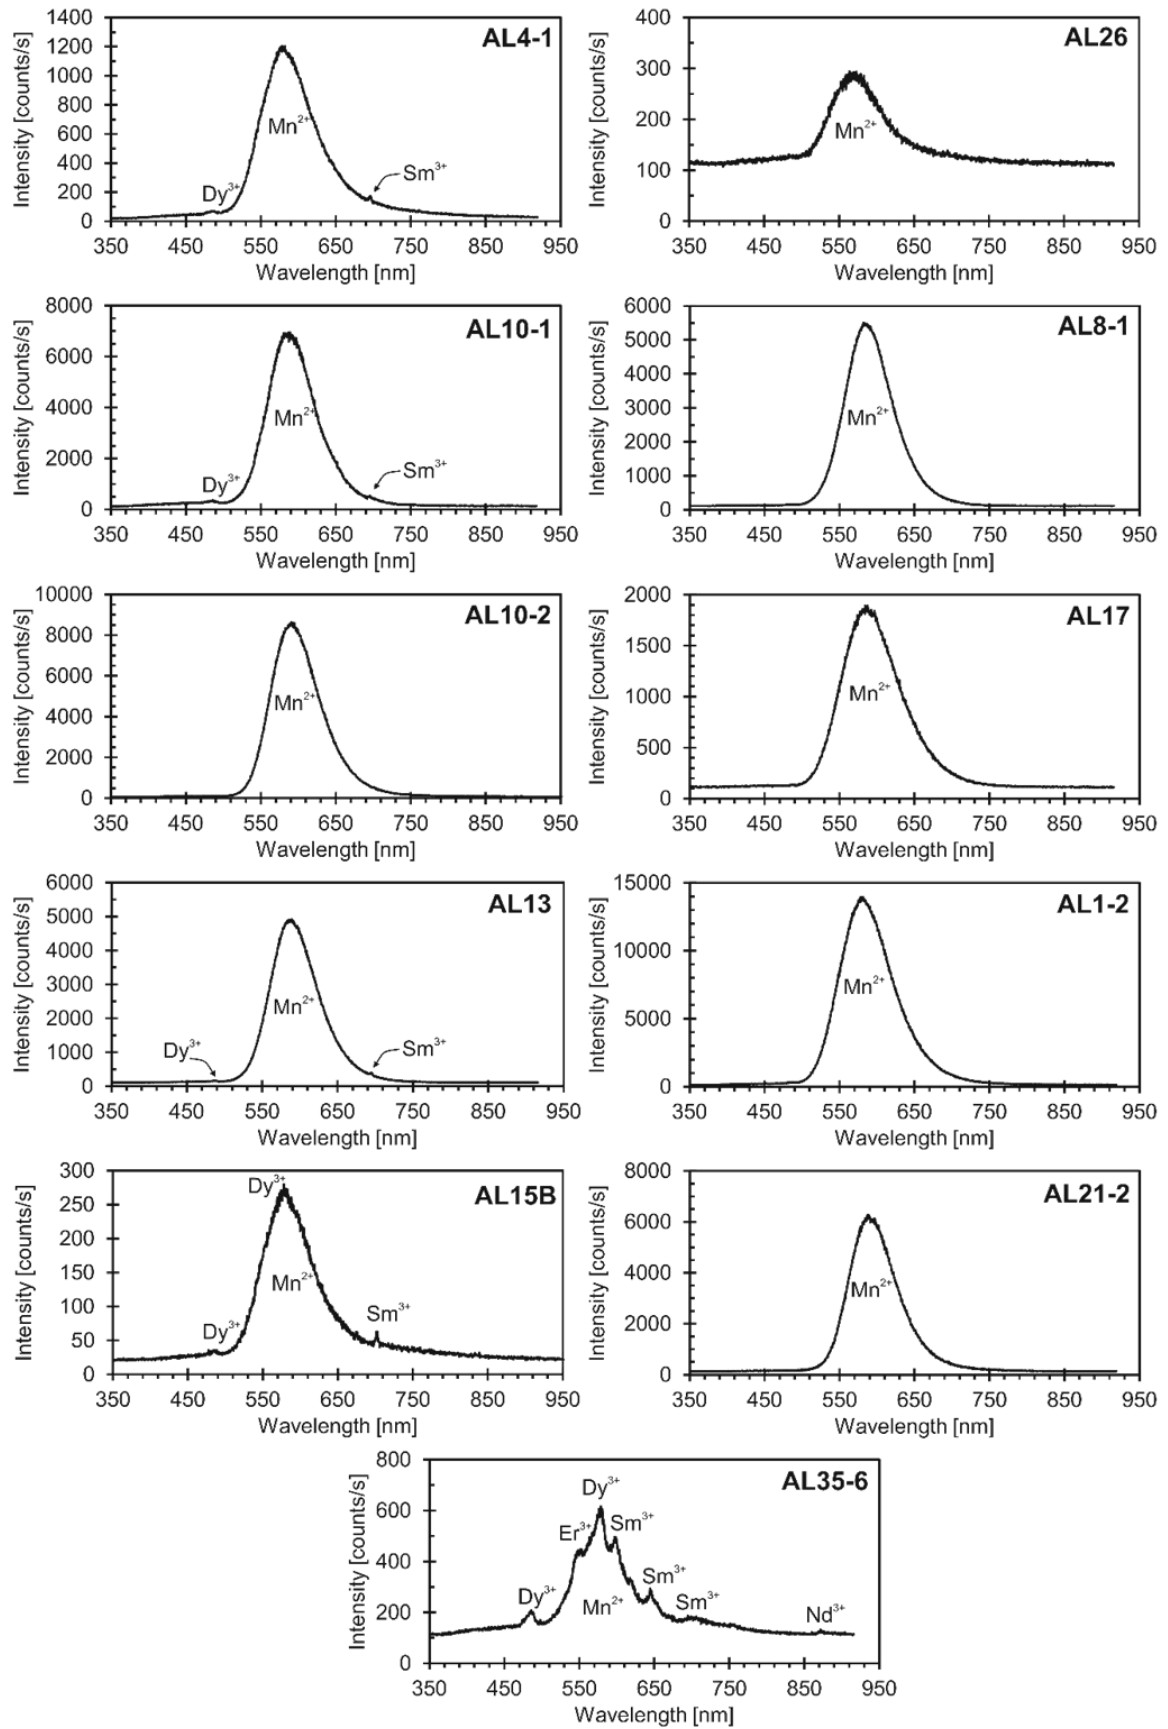

**Figure S2.** Cathodoluminescence spectra collected from apatite crystals in BIFs (AL4-1, AL10-1, AL10-2, AL13, AL15B, AL35-6), metachert (AL26), metacarbonate rocks (AL8-1, AL17), and mafic dykes (AL1-2, AL21-2).
