# Supplementary material
Source: MDPI journal article supplement (https://www.mdpi.com/2075-163X/10/1/27)
Supplement: s1 [file s1]

**Table S1.** Results of SIMS measurements of chlorine isotopes in apatite from Isua rocks.

| Analysis no.                   | $\delta^{37}\text{Cl}_{\text{SMOC}} [\text{‰}]$ | Uncertainty of Single Analysis [‰] | RMs <sup>1</sup> Repeatability During Analytical Session [‰] | Total Uncertainty <sup>2</sup> [‰] |
|--------------------------------|-------------------------------------------------|------------------------------------|--------------------------------------------------------------|------------------------------------|
| AL10-2 - banded iron formation |                                                 |                                    |                                                              |                                    |
| #Ap1-1                         | 1.27                                            | 0.02                               | 0.09                                                         | 0.09                               |
| #Ap2-1                         | 1.46                                            | 0.02                               | 0.09                                                         | 0.09                               |
| #Ap3-1                         | 1.30                                            | 0.02                               | 0.09                                                         | 0.09                               |
| #Ap4-1                         | 1.31                                            | 0.03                               | 0.09                                                         | 0.09                               |
| #Ap5-1                         | 1.46                                            | 0.03                               | 0.09                                                         | 0.09                               |
| #Ap6-1                         | 1.55                                            | 0.02                               | 0.09                                                         | 0.09                               |
| #Ap7-1                         | 1.18                                            | 0.03                               | 0.09                                                         | 0.09                               |
| #Ap8-1                         | 1.44                                            | 0.02                               | 0.09                                                         | 0.09                               |
| #Ap9-1                         | 1.50                                            | 0.02                               | 0.09                                                         | 0.09                               |
| #Ap10-1                        | 1.34                                            | 0.03                               | 0.09                                                         | 0.09                               |
| #Ap11-1                        | 1.42                                            | 0.02                               | 0.09                                                         | 0.09                               |
| #Ap12-1                        | 1.54                                            | 0.02                               | 0.09                                                         | 0.09                               |
| #Ap13-1                        | 1.43                                            | 0.02                               | 0.09                                                         | 0.09                               |
| #Ap14-1                        | 1.60                                            | 0.02                               | 0.09                                                         | 0.09                               |
| #Ap15-1                        | 1.40                                            | 0.02                               | 0.09                                                         | 0.09                               |
| #Ap16-1                        | 1.46                                            | 0.02                               | 0.09                                                         | 0.09                               |
| #Ap17-1                        | 1.27                                            | 0.02                               | 0.09                                                         | 0.09                               |
| #Ap17-2                        | 1.26                                            | 0.02                               | 0.09                                                         | 0.09                               |
| #Ap18-1                        | 1.35                                            | 0.03                               | 0.09                                                         | 0.09                               |
| #Ap18-2                        | 1.39                                            | 0.03                               | 0.09                                                         | 0.09                               |
| AL13 – banded iron formation   |                                                 |                                    |                                                              |                                    |
| #Ap1-1                         | 0.54                                            | 0.04                               | 0.24                                                         | 0.24                               |
| #Ap2-1                         | 0.61                                            | 0.04                               | 0.24                                                         | 0.24                               |
| #Ap2-2                         | 0.51                                            | 0.03                               | 0.24                                                         | 0.24                               |
| #Ap2-3                         | 0.56                                            | 0.03                               | 0.26                                                         | 0.26                               |
| #Ap2-4                         | 0.56                                            | 0.04                               | 0.26                                                         | 0.26                               |
| #Ap3-1                         | 0.40                                            | 0.05                               | 0.24                                                         | 0.24                               |
| #Ap3-2                         | 0.46                                            | 0.04                               | 0.26                                                         | 0.26                               |
| #Ap3-3                         | 0.46                                            | 0.06                               | 0.26                                                         | 0.26                               |
| #Ap4-1                         | 0.00                                            | 0.02                               | 0.24                                                         | 0.24                               |
| #Ap4-2                         | 0.16                                            | 0.03                               | 0.24                                                         | 0.24                               |
| #Ap4-3                         | 0.19                                            | 0.03                               | 0.26                                                         | 0.26                               |
| #Ap5-1                         | 0.55                                            | 0.04                               | 0.24                                                         | 0.24                               |
| #Ap5-2                         | 0.62                                            | 0.03                               | 0.26                                                         | 0.26                               |
| #Ap5-3                         | 0.52                                            | 0.05                               | 0.26                                                         | 0.26                               |
| #Ap6-1                         | 0.54                                            | 0.04                               | 0.24                                                         | 0.24                               |
| #Ap6-2                         | 0.49                                            | 0.03                               | 0.24                                                         | 0.24                               |
| #Ap7-1                         | 0.60                                            | 0.04                               | 0.24                                                         | 0.24                               |

| Analysis no.                  | $\delta^{37}\text{Cl}_{\text{SMOC}} [\text{‰}]$ | Uncertainty of Single Analysis [‰] | RMs <sup>1</sup> Repeatability During Analytical Session [‰] | Total Uncertainty <sup>2</sup> [‰] |
|-------------------------------|-------------------------------------------------|------------------------------------|--------------------------------------------------------------|------------------------------------|
| #Ap7-2                        | 0.42                                            | 0.04                               | 0.26                                                         | 0.26                               |
| #Ap8-1                        | 0.55                                            | 0.03                               | 0.24                                                         | 0.24                               |
| #Ap8-2                        | 0.53                                            | 0.03                               | 0.26                                                         | 0.26                               |
| #Ap9-1                        | 0.57                                            | 0.03                               | 0.24                                                         | 0.24                               |
| #Ap10-1                       | 0.58                                            | 0.03                               | 0.24                                                         | 0.24                               |
| #Ap11-1                       | 0.49                                            | 0.03                               | 0.24                                                         | 0.24                               |
| #Ap12-1                       | 0.69                                            | 0.03                               | 0.24                                                         | 0.24                               |
| #Ap13-1                       | 0.58                                            | 0.05                               | 0.26                                                         | 0.26                               |
| #Ap13-2                       | 0.47                                            | 0.04                               | 0.26                                                         | 0.26                               |
| #Ap13-3                       | 0.41                                            | 0.03                               | 0.26                                                         | 0.26                               |
| AL15B – banded iron formation |                                                 |                                    |                                                              |                                    |
| #Ap1-1                        | -0.27                                           | 0.16                               | 0.09                                                         | 0.19                               |
| #Ap2-1                        | -0.22                                           | 0.09                               | 0.09                                                         | 0.13                               |
| #Ap3-1                        | -0.82                                           | 0.21                               | 0.09                                                         | 0.23                               |
| #Ap4-1                        | -0.55                                           | 0.15                               | 0.09                                                         | 0.18                               |
| #Ap5-1                        | -0.33                                           | 0.21                               | 0.09                                                         | 0.23                               |
| #Ap6-1                        | -0.22                                           | 0.19                               | 0.09                                                         | 0.21                               |
| #Ap7-1                        | -1.79 <sup>3</sup>                              | 0.16                               | 0.09                                                         | 0.18                               |
| #Ap8-1                        | -0.32                                           | 0.20                               | 0.09                                                         | 0.22                               |
| #Ap9-1                        | 0.16                                            | 0.11                               | 0.09                                                         | 0.14                               |
| #Ap10-1                       | -0.47                                           | 0.19                               | 0.09                                                         | 0.21                               |
| #Ap11-1                       | -0.04                                           | 0.22                               | 0.09                                                         | 0.24                               |
| #Ap12-1                       | -0.68 <sup>3</sup>                              | –                                  | 0.09                                                         | –                                  |
| #Ap13-1                       | 0.05 <sup>3</sup>                               | 0.20                               | 0.09                                                         | 0.22                               |
| #Ap14-1                       | -0.68 <sup>3</sup>                              | 0.12                               | 0.09                                                         | 0.15                               |
| #Ap15-1                       | -0.65                                           | 0.18                               | 0.09                                                         | 0.20                               |
| AL8-1 - metacarbonate         |                                                 |                                    |                                                              |                                    |
| #Ap1-1                        | 0.22                                            | 0.05                               | 0.09                                                         | 0.11                               |
| #Ap2-1                        | 0.23                                            | 0.05                               | 0.09                                                         | 0.10                               |
| #Ap3-1                        | 0.38                                            | 0.04                               | 0.09                                                         | 0.10                               |
| #Ap4-1                        | 0.41                                            | 0.04                               | 0.09                                                         | 0.10                               |
| #Ap5-1                        | 0.48                                            | 0.05                               | 0.09                                                         | 0.11                               |
| #Ap6-1                        | 0.16                                            | 0.07                               | 0.09                                                         | 0.12                               |
| #Ap7-1                        | 0.32                                            | 0.04                               | 0.09                                                         | 0.10                               |
| #Ap8-1                        | 0.25                                            | 0.06                               | 0.09                                                         | 0.11                               |
| #Ap9-1                        | 0.30                                            | 0.04                               | 0.09                                                         | 0.10                               |
| #Ap10-1                       | 0.27                                            | 0.05                               | 0.09                                                         | 0.11                               |
| #Ap11-1                       | 0.37                                            | 0.05                               | 0.09                                                         | 0.11                               |
| #Ap12-1                       | 0.38                                            | 0.05                               | 0.09                                                         | 0.11                               |
| #Ap13-1                       | 0.32                                            | 0.04                               | 0.09                                                         | 0.10                               |

| Analysis no.         | $\delta^{37}\text{Cl}_{\text{SMOC}} [\text{‰}]$ | Uncertainty of Single Analysis [‰] | RMs <sup>1</sup> Repeatability During Analytical Session [‰] | Total Uncertainty <sup>2</sup> [‰] |
|----------------------|-------------------------------------------------|------------------------------------|--------------------------------------------------------------|------------------------------------|
| #Ap13-2              | 0.25                                            | 0.06                               | 0.09                                                         | 0.11                               |
| #Ap14-1              | 0.46                                            | 0.05                               | 0.09                                                         | 0.11                               |
| AL17 - metacarbonate |                                                 |                                    |                                                              |                                    |
| #Ap1-1               | 0.03                                            | 0.05                               | 0.12                                                         | 0.13                               |
| #Ap2-1               | 0.19                                            | 0.04                               | 0.12                                                         | 0.13                               |
| #Ap3-1               | 0.13                                            | 0.04                               | 0.12                                                         | 0.13                               |
| #Ap4-1               | 0.22                                            | 0.04                               | 0.12                                                         | 0.13                               |
| #Ap5-1               | 0.33                                            | 0.05                               | 0.12                                                         | 0.14                               |
| #Ap6-1               | 0.33                                            | 0.07                               | 0.12                                                         | 0.14                               |
| #Ap7-1               | 0.30                                            | 0.05                               | 0.12                                                         | 0.14                               |
| #Ap8-1               | 0.68                                            | 0.07                               | 0.12                                                         | 0.14                               |
| #Ap9-1               | -0.08                                           | 0.06                               | 0.12                                                         | 0.14                               |
| #Ap10-1              | 0.15                                            | 0.04                               | 0.12                                                         | 0.13                               |
| #Ap11-1              | 0.08                                            | 0.05                               | 0.12                                                         | 0.13                               |
| #Ap12-1              | 0.07                                            | 0.06                               | 0.12                                                         | 0.14                               |
| #Ap13-1              | 0.17                                            | 0.05                               | 0.12                                                         | 0.14                               |
| #Ap14-1              | 0.17                                            | 0.05                               | 0.12                                                         | 0.13                               |
| #Ap15-1              | 0.33                                            | 0.06                               | 0.12                                                         | 0.14                               |
| #Ap16-1              | 0.47                                            | 0.08                               | 0.24                                                         | 0.25                               |
| #Ap16-2              | 0.61                                            | 0.08                               | 0.24                                                         | 0.25                               |
| #Ap16-3              | 0.30                                            | 0.07                               | 0.26                                                         | 0.27                               |
| #Ap17-1              | 0.16                                            | 0.05                               | 0.24                                                         | 0.24                               |
| #Ap17-2              | 0.37                                            | 0.06                               | 0.26                                                         | 0.26                               |
| #Ap18-1              | 0.26                                            | 0.05                               | 0.24                                                         | 0.24                               |
| #Ap18-2              | 0.31                                            | 0.05                               | 0.26                                                         | 0.26                               |
| #Ap19-1              | 0.20                                            | 0.04                               | 0.24                                                         | 0.24                               |
| #Ap19-2              | 0.30                                            | 0.06                               | 0.26                                                         | 0.26                               |
| #Ap20-1              | 0.43                                            | 0.04                               | 0.24                                                         | 0.24                               |
| #Ap20-2              | 0.47                                            | 0.08                               | 0.26                                                         | 0.27                               |
| #Ap21-1              | 0.34                                            | 0.06                               | 0.24                                                         | 0.25                               |
| #Ap21-2              | 0.34                                            | 0.07                               | 0.26                                                         | 0.27                               |
| #Ap22-1              | 0.42                                            | 0.06                               | 0.24                                                         | 0.25                               |
| #Ap23-1              | 0.41                                            | 0.07                               | 0.24                                                         | 0.25                               |
| #Ap24-1              | 0.26                                            | 0.05                               | 0.24                                                         | 0.24                               |
| #Ap24-2              | 0.40                                            | 0.05                               | 0.26                                                         | 0.26                               |
| #Ap25-1              | 0.54                                            | 0.05                               | 0.24                                                         | 0.24                               |
| #Ap26-1              | 0.06                                            | 0.04                               | 0.24                                                         | 0.24                               |
| #Ap26-2              | 0.17                                            | 0.06                               | 0.26                                                         | 0.26                               |
| #Ap27-1              | 0.57                                            | 0.06                               | 0.26                                                         | 0.26                               |
| #Ap28-1              | 0.27                                            | 0.05                               | 0.26                                                         | 0.26                               |

| Analysis no.        | $\delta^{37}\text{Cl}_{\text{SMOC}} [\text{‰}]$ | Uncertainty of Single Analysis [‰] | RMs <sup>1</sup> Repeatability During Analytical Session [‰] | Total Uncertainty <sup>2</sup> [‰] |
|---------------------|-------------------------------------------------|------------------------------------|--------------------------------------------------------------|------------------------------------|
| AL21-2 - mafic dyke |                                                 |                                    |                                                              |                                    |
| #Ap1-1              | 0.21                                            | 0.03                               | 0.09                                                         | 0.09                               |
| #Ap1-2              | 0.25                                            | 0.02                               | 0.09                                                         | 0.09                               |
| #Ap2-1              | 0.05                                            | 0.03                               | 0.09                                                         | 0.09                               |
| #Ap2-2              | -0.01                                           | 0.03                               | 0.09                                                         | 0.09                               |
| #Ap3-1              | 0.31                                            | 0.02                               | 0.09                                                         | 0.09                               |
| #Ap4-1              | 0.27                                            | 0.03                               | 0.09                                                         | 0.09                               |
| #Ap5-1              | 0.22                                            | 0.03                               | 0.09                                                         | 0.09                               |
| #Ap6-1              | 0.31                                            | 0.03                               | 0.09                                                         | 0.09                               |
| #Ap7-1              | 0.10                                            | 0.03                               | 0.09                                                         | 0.09                               |
| #Ap7-2              | 0.38                                            | 0.03                               | 0.09                                                         | 0.09                               |
| #Ap7-3              | 0.27                                            | 0.03                               | 0.09                                                         | 0.10                               |
| #Ap7-4              | 0.13                                            | 0.03                               | 0.09                                                         | 0.10                               |
| #Ap8-1              | 0.03                                            | 0.03                               | 0.09                                                         | 0.09                               |
| #Ap8-2              | 0.24                                            | 0.04                               | 0.09                                                         | 0.10                               |
| #Ap8-3              | 0.26                                            | 0.03                               | 0.09                                                         | 0.10                               |
| #Ap9-1              | 0.30                                            | 0.03                               | 0.09                                                         | 0.09                               |
| #Ap10-1             | -0.06                                           | 0.03                               | 0.09                                                         | 0.09                               |
| #Ap10-2             | 0.27                                            | 0.02                               | 0.09                                                         | 0.09                               |
| #Ap10-3             | 0.03                                            | 0.04                               | 0.09                                                         | 0.10                               |
| #Ap10-4             | 0.09                                            | 0.03                               | 0.09                                                         | 0.10                               |
| #Ap10-5             | 0.18                                            | 0.03                               | 0.09                                                         | 0.10                               |
| #Ap11-1             | 0.24                                            | 0.03                               | 0.09                                                         | 0.10                               |
| #Ap11-2             | 0.25                                            | 0.03                               | 0.09                                                         | 0.10                               |
| #Ap12-1             | 0.00                                            | 0.03                               | 0.09                                                         | 0.10                               |
| #Ap12-2             | -0.10                                           | 0.04                               | 0.09                                                         | 0.10                               |

<sup>1</sup> RMs—reference materials. <sup>2</sup> Total uncertainty combines the repeatability of  $^{37}\text{Cl}/^{35}\text{Cl}$  measurements on the reference materials and the internal precision of each analysis. <sup>3</sup> An analysis has been rejected after detailed inspection of the data due to a crack (#Ap7-1, #Ap13-1, #Ap14-1) or very low Cl signal (#Ap12-1) and corresponding low internal precision of the analysis.
